# Supplementary material for: Toothpicks and toy football players: frictional jamming causes locomotion of vertically-shaken assymetrical objects
Source: Royal Society of Chemistry journal article supplement (doi:10.1039/d4sm01408a), 2025-01-01
Supplement: d4sm01408a2.pdf [file d4sm01408a2.pdf]

## Movies and their description

All the videos can be found in the following playlist

[https://www.youtube.com/playlist?list=PLtTxBVFV1XbjT\\_6QfNQiG6u82oEBwAo44](https://www.youtube.com/playlist?list=PLtTxBVFV1XbjT_6QfNQiG6u82oEBwAo44)

1. **Hand held toothpicks in jar.** One toothpick is marked. Videos shows toothpicks advancing during hand shaking. Both Clockise (CW) and CounterClockWise (CCW) are shown. **Movie 1**
2. **Electrically vibrated toothpicks in a jar.** Vertical oscillations induce rotation of toothpicks in the slanted direction. **Movie 2**
3. **A slanted rod in an annular part of a thick hollow cylinder..** Vertical oscillations locomotion of the rod. **Movie 3**
4. **Persistent cyclic motion using speedometer cable.** **Movie 4**
5. **Results from simulation.** High values of torsional stiffness produces large flight paths. **Movie 5**
6. **Results from simulation.** Low values torsional stiffness produces sliding motion. **Movie 6**
